# Supplementary material for: Growth Factor Screening in Dystrophic Muscles Reveals PDGFB/PDGFRB-Mediated Migration of Interstitial Stem Cells
Source: Int J Mol Sci. 2019 Mar 5;20(5):1118. doi: 10.3390/ijms20051118 (PMC6429448; doi:10.3390/ijms20051118)
Supplement: Supplementary file 1 [file ijms-20-01118-s001.zip]

Archive with 8 entries (8 files):
- supplementary files/ijms-448273-supplementary.pdf
- supplementary files/Suppl Fig1 GO analysis.png
- supplementary files/Supplementary table 1 - Antibodies titration table.xlsx
- supplementary files/Supplementary table 2 - sgca_wt.xlsx
- supplementary files/Supplementary table 3 - ic_sgcb_wt.xlsx
- supplementary files/Supplementary table 4 - id_sgcb_wt.xlsx
- supplementary files/Supplementary table 5 - ic_sgcb_sgca.xlsx
- supplementary files/Supplementary table 6 - id_sgcb_ic_sgcb.xlsx
