# Supplementary material for: Growth Factor Screening in Dystrophic Muscles Reveals PDGFB/PDGFRB-Mediated Migration of Interstitial Stem Cells
Source: Int J Mol Sci. 2019 Mar 5;20(5):1118. doi: 10.3390/ijms20051118 (PMC6429448; doi:10.3390/ijms20051118)
Supplement: Supplementary file 1 [file ijms-20-01118-s001.zip › supplementary files/Supplementary table 1 - Antibodies titration table.xlsx]

## Sheet: Blad1
Antibodies	Concentration	Supplier	Reference
Itga7 PE-Vio770	0.15 ng/106 cells	Miltenyi Biotec	#130-103-357
TER119 FITC	0.5 μg/106 cells	Thermo Scientific	#11-5921-81
CD31-FITC	0.25 μg/106 cells	Thermo Scientific	#11-0311-81
CD45-FITC	0.25 μg/106 cells	Thermo Scientific	#11-0451-81
Ly6a-SB436	0.5 μg/106 cells	Thermo Scientific	#62-5981-80
Alpl-PE	0.25 μg/106 cells	R&D systems	#FAB1448P-100
CD34-eFluor660	2.5 µg/106 cells	Thermo Scientific	#50-0341-80
CD140a-APC	1/100	Thermo Scientific	#17-1401-81
CD140b-APC	1/100	Thermo Scientific	#17-1402-82
CCR1-APC	1/10	R&D systems	#FAB5986A
CCR5-PE	1/10	Thermo Scientific	#12-1951-82
CD44-APC	1/400	Thermo Scientific	#17-0441-82
