# Supplementary material for: Growth Factor Screening in Dystrophic Muscles Reveals PDGFB/PDGFRB-Mediated Migration of Interstitial Stem Cells
Source: Int J Mol Sci. 2019 Mar 5;20(5):1118. doi: 10.3390/ijms20051118 (PMC6429448; doi:10.3390/ijms20051118)
Supplement: Supplementary file 1 [file ijms-20-01118-s001.zip › supplementary files/Supplementary table 2 - sgca_wt.xlsx]

## Sheet: Sheet1
	Gene	genotype	fold_change_avg	fold_change_sem	p_value	padj	significant	DE
14	Ccl25	Sgca-null / Wild-type	0.563116	0.00975787	0.0312264	0.193659	p < 0.05	Down
43	Cx3cr1	Sgca-null / Wild-type	0.488052	0.0208267	0.0438073	0.219117	p < 0.05	Down
45	Cxcl10	Sgca-null / Wild-type	0.448653	0.0130742	0.0130766	0.170261	p < 0.05	Down
65	Hif1a	Sgca-null / Wild-type	0.729049	0.0161888	0.00303044	0.137371	p < 0.05	Down
1	Ackr2	Sgca-null / Wild-type	1.99006	0.0718728	0.0656802	0.251429	Not significant	Not significant
2	Ackr3	Sgca-null / Wild-type	0.689436	0.0412418	0.0672786	0.251429	Not significant	Not significant
3	Ackr4	Sgca-null / Wild-type	1.35449	0.0377784	0.141494	0.351643	Not significant	Not significant
4	C5ar1	Sgca-null / Wild-type	1.3668	0.0659862	0.317033	0.545712	Not significant	Not significant
5	Ccl1	Sgca-null / Wild-type	3.84953	0.345551	0.256155	0.496066	Not significant	Not significant
7	Ccl12	Sgca-null / Wild-type	1.12367	0.0627626	0.681688	0.835124	Not significant	Not significant
9	Ccl19	Sgca-null / Wild-type	2.07278	0.251986	0.257482	0.496066	Not significant	Not significant
10	Ccl2	Sgca-null / Wild-type	1.80681	0.0875751	0.0657874	0.251429	Not significant	Not significant
11	Ccl20	Sgca-null / Wild-type	1.72884	0.027572	0.0518514	0.234168	Not significant	Not significant
15	Ccl26	Sgca-null / Wild-type	1.54451	0.0894288	0.457276	0.68575	Not significant	Not significant
16	Ccl28	Sgca-null / Wild-type	0.863356	0.0551075	0.782685	0.900624	Not significant	Not significant
17	Ccl3	Sgca-null / Wild-type	1.38669	0.0578309	0.36518	0.578776	Not significant	Not significant
18	Ccl4	Sgca-null / Wild-type	1.6546	0.0857462	0.256443	0.496066	Not significant	Not significant
20	Ccl6	Sgca-null / Wild-type	1.0904	0.121838	0.803078	0.911377	Not significant	Not significant
23	Ccl9	Sgca-null / Wild-type	1.71614	0.0750914	0.112917	0.307956	Not significant	Not significant
25	Ccr10	Sgca-null / Wild-type	0.910088	0.0419653	0.757325	0.883546	Not significant	Not significant
26	Ccr1l1	Sgca-null / Wild-type	3.09963	0.221827	0.184284	0.405931	Not significant	Not significant
28	Ccr3	Sgca-null / Wild-type	1.45036	0.0569925	0.130352	0.335877	Not significant	Not significant
29	Ccr4	Sgca-null / Wild-type	1.23735	0.053427	0.680876	0.835124	Not significant	Not significant
30	Ccr5	Sgca-null / Wild-type	1.57427	0.0537855	0.0884196	0.277136	Not significant	Not significant
32	Ccr7	Sgca-null / Wild-type	1.78252	0.0649281	0.118295	0.310525	Not significant	Not significant
33	Ccr8	Sgca-null / Wild-type	0.558479	0.013349	0.0668304	0.251429	Not significant	Not significant
34	Ccr9	Sgca-null / Wild-type	0.980728	0.0360644	0.944185	0.983259	Not significant	Not significant
35	Ccrl2	Sgca-null / Wild-type	1.02518	0.0507154	0.904583	0.956989	Not significant	Not significant
36	Cmklr1	Sgca-null / Wild-type	0.834506	0.05104	0.537747	0.748931	Not significant	Not significant
37	Cmtm2a	Sgca-null / Wild-type	1.91363	0.0704141	0.184602	0.405931	Not significant	Not significant
38	Cmtm3	Sgca-null / Wild-type	0.995098	0.0250313	0.946104	0.983259	Not significant	Not significant
40	Cmtm5	Sgca-null / Wild-type	1.21993	0.0987943	0.712063	0.853931	Not significant	Not significant
41	Cmtm6	Sgca-null / Wild-type	1.23309	0.046351	0.295436	0.519175	Not significant	Not significant
42	Cx3cl1	Sgca-null / Wild-type	1.0278	0.0382273	0.894562	0.950225	Not significant	Not significant
46	Cxcl11	Sgca-null / Wild-type	1.64952	0.0833497	0.335047	0.559978	Not significant	Not significant
47	Cxcl12	Sgca-null / Wild-type	2.03565	0.217569	0.0848018	0.273975	Not significant	Not significant
48	Cxcl13	Sgca-null / Wild-type	5.06516	0.560474	0.104683	0.299373	Not significant	Not significant
49	Cxcl14	Sgca-null / Wild-type	2.06767	0.19526	0.15851	0.376126	Not significant	Not significant
50	Cxcl15	Sgca-null / Wild-type	1.19953	0.0428269	0.567285	0.771067	Not significant	Not significant
51	Cxcl16	Sgca-null / Wild-type	1.05373	0.046139	0.765792	0.89095	Not significant	Not significant
52	Cxcl2	Sgca-null / Wild-type	1.22036	0.0474062	0.512211	0.725715	Not significant	Not significant
53	Cxcl3	Sgca-null / Wild-type	1.09584	0.151344	0.953701	0.984164	Not significant	Not significant
55	Cxcl9	Sgca-null / Wild-type	0.543118	0.0201509	0.0918345	0.279496	Not significant	Not significant
56	Cxcr1	Sgca-null / Wild-type	2.63678	0.0937541	0.0877675	0.277136	Not significant	Not significant
57	Cxcr2	Sgca-null / Wild-type	8.31782	0.936196	0.117065	0.309229	Not significant	Not significant
58	Cxcr3	Sgca-null / Wild-type	1.85341	0.0643908	0.0866291	0.276883	Not significant	Not significant
59	Cxcr4	Sgca-null / Wild-type	0.745905	0.0370333	0.199076	0.426258	Not significant	Not significant
60	Cxcr5	Sgca-null / Wild-type	16.8333	7.20087	0.349801	0.564047	Not significant	Not significant
61	Cxcr6	Sgca-null / Wild-type	0.604801	0.025125	0.116251	0.309229	Not significant	Not significant
62	Darc	Sgca-null / Wild-type	1.59073	0.0479949	0.078175	0.260583	Not significant	Not significant
63	Fpr1	Sgca-null / Wild-type	1.98775	0.115992	0.248065	0.493778	Not significant	Not significant
64	Gpr17	Sgca-null / Wild-type	0.968001	0.0163446	0.755055	0.883351	Not significant	Not significant
66	Ifng	Sgca-null / Wild-type	2.15568	0.164526	0.350515	0.564047	Not significant	Not significant
67	Il16	Sgca-null / Wild-type	0.980386	0.027553	0.894505	0.950225	Not significant	Not significant
68	Il1b	Sgca-null / Wild-type	2.0888	0.109549	0.108315	0.301273	Not significant	Not significant
69	Il4	Sgca-null / Wild-type	1.49902	0.0578405	0.345368	0.564047	Not significant	Not significant
70	Il6	Sgca-null / Wild-type	1.11036	0.0613296	0.837178	0.930198	Not significant	Not significant
72	Itgb2	Sgca-null / Wild-type	1.37052	0.0427838	0.152004	0.368843	Not significant	Not significant
73	Mapk1	Sgca-null / Wild-type	1.06344	0.0414558	0.52711	0.742906	Not significant	Not significant
74	Mapk14	Sgca-null / Wild-type	1.17069	0.0235335	0.127644	0.330928	Not significant	Not significant
77	Slit2	Sgca-null / Wild-type	0.534935	0.0205744	0.0699422	0.251429	Not significant	Not significant
78	Tgfb1	Sgca-null / Wild-type	1.06297	0.0556106	0.695962	0.848622	Not significant	Not significant
79	Tlr2	Sgca-null / Wild-type	1.27106	0.0318361	0.194178	0.420385	Not significant	Not significant
80	Tlr4	Sgca-null / Wild-type	0.99548	0.0291358	0.965646	0.989302	Not significant	Not significant
81	Tnf	Sgca-null / Wild-type	1.28664	0.0484984	0.395757	0.611095	Not significant	Not significant
82	Tymp	Sgca-null / Wild-type	1.59318	0.0596111	0.163149	0.382809	Not significant	Not significant
6	Ccl11	Sgca-null / Wild-type	15.6851	1.78525	0.0170261	0.170261	p < 0.05	Up
8	Ccl17	Sgca-null / Wild-type	3.55343	0.18182	0.0313543	0.193659	p < 0.05	Up
12	Ccl22	Sgca-null / Wild-type	2.54035	0.0900879	0.0456993	0.225808	p < 0.05	Up
13	Ccl24	Sgca-null / Wild-type	3.37112	0.142582	0.0130357	0.170261	p < 0.05	Up
19	Ccl5	Sgca-null / Wild-type	2.02043	0.0621004	0.0164573	0.170261	p < 0.05	Up
21	Ccl7	Sgca-null / Wild-type	3.91865	0.212123	0.00627866	0.137371	p < 0.05	Up
22	Ccl8	Sgca-null / Wild-type	19.5031	1.94155	0.00362069	0.137371	p < 0.05	Up
24	Ccr1	Sgca-null / Wild-type	1.93088	0.0540421	0.0398211	0.219117	p < 0.05	Up
27	Ccr2	Sgca-null / Wild-type	4.11392	0.0795955	0.00102509	0.137371	p < 0.05	Up
31	Ccr6	Sgca-null / Wild-type	6.30175	0.294937	0.0256277	0.180884	p < 0.05	Up
39	Cmtm4	Sgca-null / Wild-type	1.92827	0.0761667	0.049961	0.228083	p < 0.05	Up
44	Cxcl1	Sgca-null / Wild-type	1.86683	0.0507068	0.0433699	0.219117	p < 0.05	Up
54	Cxcl5	Sgca-null / Wild-type	3.21431	0.220025	0.0438235	0.219117	p < 0.05	Up
71	Itgam	Sgca-null / Wild-type	2.34691	0.0547358	0.0212993	0.180884	p < 0.05	Up
75	Pf4	Sgca-null / Wild-type	2.9832	0.448953	0.00980232	0.170261	p < 0.05	Up
76	Ppbp	Sgca-null / Wild-type	10.3217	3.15766	0.0296547	0.193659	p < 0.05	Up
83	Xcl1	Sgca-null / Wild-type	4.95333	0.254003	0.0160593	0.170261	p < 0.05	Up
84	Xcr1	Sgca-null / Wild-type	3.19291	0.167301	0.0496386	0.228083	p < 0.05	Up
