# Supplementary material for: Growth Factor Screening in Dystrophic Muscles Reveals PDGFB/PDGFRB-Mediated Migration of Interstitial Stem Cells
Source: Int J Mol Sci. 2019 Mar 5;20(5):1118. doi: 10.3390/ijms20051118 (PMC6429448; doi:10.3390/ijms20051118)
Supplement: Supplementary file 1 [file ijms-20-01118-s001.zip › supplementary files/Supplementary table 6 - id_sgcb_ic_sgcb.xlsx]

## Sheet: Sheet1
	Gene	genotype	fold_change_avg	fold_change_sem	p_value	padj	significant	DE
4	C5ar1	ID Sgcb-null / IC Sgcb-null	0.451789	0.0227893	0.0213231	0.180884	p < 0.05	Down
9	Ccl19	ID Sgcb-null / IC Sgcb-null	0.218291	0.00747265	0.00363445	0.137371	p < 0.05	Down
10	Ccl2	ID Sgcb-null / IC Sgcb-null	0.346867	0.0235129	0.0101007	0.170261	p < 0.05	Down
12	Ccl22	ID Sgcb-null / IC Sgcb-null	0.52751	0.0101324	0.0380727	0.216089	p < 0.05	Down
14	Ccl25	ID Sgcb-null / IC Sgcb-null	0.492724	0.0122646	0.0324801	0.194881	p < 0.05	Down
19	Ccl5	ID Sgcb-null / IC Sgcb-null	0.203132	0.0103407	0.00520672	0.137371	p < 0.05	Down
20	Ccl6	ID Sgcb-null / IC Sgcb-null	0.292818	0.0379745	0.0289268	0.193659	p < 0.05	Down
21	Ccl7	ID Sgcb-null / IC Sgcb-null	0.336679	0.0164818	0.00962731	0.170261	p < 0.05	Down
23	Ccl9	ID Sgcb-null / IC Sgcb-null	0.309762	0.0216264	0.037563	0.216089	p < 0.05	Down
29	Ccr4	ID Sgcb-null / IC Sgcb-null	0.501686	0.012155	0.0396678	0.219117	p < 0.05	Down
31	Ccr6	ID Sgcb-null / IC Sgcb-null	0.1204	0.00966772	0.0422696	0.219117	p < 0.05	Down
33	Ccr8	ID Sgcb-null / IC Sgcb-null	0.139125	0.00706873	0.025553	0.180884	p < 0.05	Down
48	Cxcl13	ID Sgcb-null / IC Sgcb-null	0.0235912	0.00340688	0.00466486	0.137371	p < 0.05	Down
52	Cxcl2	ID Sgcb-null / IC Sgcb-null	0.206276	0.0109614	0.0251299	0.180884	p < 0.05	Down
53	Cxcl3	ID Sgcb-null / IC Sgcb-null	0.111826	0.00406407	0.0022267	0.137371	p < 0.05	Down
55	Cxcl9	ID Sgcb-null / IC Sgcb-null	0.443651	0.0135862	0.0155948	0.170261	p < 0.05	Down
63	Fpr1	ID Sgcb-null / IC Sgcb-null	0.219282	0.0125286	0.0226746	0.180884	p < 0.05	Down
66	Ifng	ID Sgcb-null / IC Sgcb-null	0.262611	0.0112169	0.0490078	0.228083	p < 0.05	Down
83	Xcl1	ID Sgcb-null / IC Sgcb-null	0.00295836	0.000236954	0.023932	0.180884	p < 0.05	Down
1	Ackr2	ID Sgcb-null / IC Sgcb-null	0.846986	0.0619421	0.719634	0.858654	Not significant	Not significant
2	Ackr3	ID Sgcb-null / IC Sgcb-null	0.97458	0.0735599	0.892339	0.950225	Not significant	Not significant
3	Ackr4	ID Sgcb-null / IC Sgcb-null	0.736516	0.0387572	0.321163	0.546108	Not significant	Not significant
5	Ccl1	ID Sgcb-null / IC Sgcb-null	0.414593	0.0163994	0.0995433	0.290335	Not significant	Not significant
6	Ccl11	ID Sgcb-null / IC Sgcb-null	0.852247	0.0991976	0.781938	0.900624	Not significant	Not significant
7	Ccl12	ID Sgcb-null / IC Sgcb-null	0.528532	0.0664579	0.272142	0.499125	Not significant	Not significant
8	Ccl17	ID Sgcb-null / IC Sgcb-null	0.322809	0.0199536	0.100889	0.292231	Not significant	Not significant
11	Ccl20	ID Sgcb-null / IC Sgcb-null	1.29404	0.050928	0.613021	0.80459	Not significant	Not significant
13	Ccl24	ID Sgcb-null / IC Sgcb-null	1.09309	0.0482234	0.779227	0.900624	Not significant	Not significant
15	Ccl26	ID Sgcb-null / IC Sgcb-null	0.764599	0.0538388	0.707501	0.853881	Not significant	Not significant
16	Ccl28	ID Sgcb-null / IC Sgcb-null	0.628736	0.0513112	0.561407	0.768049	Not significant	Not significant
17	Ccl3	ID Sgcb-null / IC Sgcb-null	0.883465	0.0646159	0.826141	0.920944	Not significant	Not significant
18	Ccl4	ID Sgcb-null / IC Sgcb-null	0.420154	0.0342046	0.240968	0.48892	Not significant	Not significant
22	Ccl8	ID Sgcb-null / IC Sgcb-null	0.734463	0.133368	0.640453	0.8226	Not significant	Not significant
24	Ccr1	ID Sgcb-null / IC Sgcb-null	0.521924	0.0356954	0.135334	0.344486	Not significant	Not significant
25	Ccr10	ID Sgcb-null / IC Sgcb-null	0.80664	0.0421836	0.534697	0.748576	Not significant	Not significant
26	Ccr1l1	ID Sgcb-null / IC Sgcb-null	3.37133	0.227373	0.139729	0.351643	Not significant	Not significant
27	Ccr2	ID Sgcb-null / IC Sgcb-null	0.589148	0.0399289	0.141168	0.351643	Not significant	Not significant
28	Ccr3	ID Sgcb-null / IC Sgcb-null	0.650256	0.046786	0.212238	0.44794	Not significant	Not significant
30	Ccr5	ID Sgcb-null / IC Sgcb-null	0.784614	0.0535728	0.476987	0.696917	Not significant	Not significant
32	Ccr7	ID Sgcb-null / IC Sgcb-null	0.593065	0.0288927	0.229695	0.469513	Not significant	Not significant
34	Ccr9	ID Sgcb-null / IC Sgcb-null	0.527527	0.0358511	0.243992	0.492677	Not significant	Not significant
35	Ccrl2	ID Sgcb-null / IC Sgcb-null	0.761816	0.0409898	0.267185	0.496239	Not significant	Not significant
36	Cmklr1	ID Sgcb-null / IC Sgcb-null	0.958229	0.0763984	0.894403	0.950225	Not significant	Not significant
37	Cmtm2a	ID Sgcb-null / IC Sgcb-null	0.688379	0.00889026	0.0716129	0.251577	Not significant	Not significant
38	Cmtm3	ID Sgcb-null / IC Sgcb-null	0.907116	0.0305012	0.333614	0.559978	Not significant	Not significant
39	Cmtm4	ID Sgcb-null / IC Sgcb-null	0.82497	0.0515195	0.500574	0.716849	Not significant	Not significant
40	Cmtm5	ID Sgcb-null / IC Sgcb-null	0.849002	0.017807	0.28056	0.50573	Not significant	Not significant
41	Cmtm6	ID Sgcb-null / IC Sgcb-null	0.981137	0.0515349	0.92995	0.978895	Not significant	Not significant
42	Cx3cl1	ID Sgcb-null / IC Sgcb-null	1.1283	0.0613467	0.622783	0.809811	Not significant	Not significant
43	Cx3cr1	ID Sgcb-null / IC Sgcb-null	1.46684	0.118042	0.393411	0.609714	Not significant	Not significant
44	Cxcl1	ID Sgcb-null / IC Sgcb-null	1.02388	0.0662162	0.953261	0.984164	Not significant	Not significant
45	Cxcl10	ID Sgcb-null / IC Sgcb-null	0.383009	0.0368876	0.182385	0.405301	Not significant	Not significant
46	Cxcl11	ID Sgcb-null / IC Sgcb-null	0.474604	0.0181761	0.0791189	0.261216	Not significant	Not significant
47	Cxcl12	ID Sgcb-null / IC Sgcb-null	1.01103	0.141153	0.970307	0.989302	Not significant	Not significant
49	Cxcl14	ID Sgcb-null / IC Sgcb-null	0.946357	0.101751	0.88548	0.950225	Not significant	Not significant
50	Cxcl15	ID Sgcb-null / IC Sgcb-null	1.28112	0.050879	0.490189	0.705066	Not significant	Not significant
51	Cxcl16	ID Sgcb-null / IC Sgcb-null	0.847124	0.0317438	0.262052	0.496239	Not significant	Not significant
54	Cxcl5	ID Sgcb-null / IC Sgcb-null	1.31581	0.122521	0.574271	0.776316	Not significant	Not significant
56	Cxcr1	ID Sgcb-null / IC Sgcb-null	1.84569	0.177028	0.566755	0.771067	Not significant	Not significant
57	Cxcr2	ID Sgcb-null / IC Sgcb-null	1.5158	0.0950695	0.448024	0.674445	Not significant	Not significant
58	Cxcr3	ID Sgcb-null / IC Sgcb-null	0.432359	0.025732	0.165051	0.38299	Not significant	Not significant
59	Cxcr4	ID Sgcb-null / IC Sgcb-null	1.55117	0.0770106	0.0657264	0.251429	Not significant	Not significant
60	Cxcr5	ID Sgcb-null / IC Sgcb-null	0.410582	0.0161786	0.0682477	0.251429	Not significant	Not significant
61	Cxcr6	ID Sgcb-null / IC Sgcb-null	0.500071	0.0204382	0.070041	0.251429	Not significant	Not significant
62	Darc	ID Sgcb-null / IC Sgcb-null	0.648701	0.043141	0.346426	0.564047	Not significant	Not significant
64	Gpr17	ID Sgcb-null / IC Sgcb-null	0.68404	0.0378595	0.289687	0.513369	Not significant	Not significant
65	Hif1a	ID Sgcb-null / IC Sgcb-null	1.06809	0.0953364	0.722664	0.859537	Not significant	Not significant
67	Il16	ID Sgcb-null / IC Sgcb-null	0.965891	0.0451165	0.885058	0.950225	Not significant	Not significant
68	Il1b	ID Sgcb-null / IC Sgcb-null	0.399789	0.0338466	0.104798	0.299373	Not significant	Not significant
69	Il4	ID Sgcb-null / IC Sgcb-null	0.289087	0.017092	0.0940101	0.280917	Not significant	Not significant
70	Il6	ID Sgcb-null / IC Sgcb-null	0.384855	0.0318713	0.181834	0.405301	Not significant	Not significant
71	Itgam	ID Sgcb-null / IC Sgcb-null	0.522741	0.0253101	0.0911706	0.279496	Not significant	Not significant
72	Itgb2	ID Sgcb-null / IC Sgcb-null	0.814098	0.0700281	0.619817	0.809411	Not significant	Not significant
73	Mapk1	ID Sgcb-null / IC Sgcb-null	0.819741	0.0669214	0.347006	0.564047	Not significant	Not significant
74	Mapk14	ID Sgcb-null / IC Sgcb-null	0.939806	0.0668175	0.788142	0.901961	Not significant	Not significant
75	Pf4	ID Sgcb-null / IC Sgcb-null	0.583075	0.103934	0.319924	0.546108	Not significant	Not significant
76	Ppbp	ID Sgcb-null / IC Sgcb-null	0.676935	0.181228	0.681214	0.835124	Not significant	Not significant
77	Slit2	ID Sgcb-null / IC Sgcb-null	1.37354	0.0731216	0.246103	0.493386	Not significant	Not significant
78	Tgfb1	ID Sgcb-null / IC Sgcb-null	0.944928	0.0342873	0.598275	0.794746	Not significant	Not significant
79	Tlr2	ID Sgcb-null / IC Sgcb-null	0.73388	0.0259882	0.160627	0.379007	Not significant	Not significant
80	Tlr4	ID Sgcb-null / IC Sgcb-null	0.722771	0.0541052	0.262805	0.496239	Not significant	Not significant
81	Tnf	ID Sgcb-null / IC Sgcb-null	1.18976	0.0629557	0.657908	0.832293	Not significant	Not significant
82	Tymp	ID Sgcb-null / IC Sgcb-null	1.11323	0.0635014	0.81854	0.916765	Not significant	Not significant
84	Xcr1	ID Sgcb-null / IC Sgcb-null	0.573017	0.0193247	0.114688	0.309229	Not significant	Not significant
